# Supplementary material for: Research Translation to Promote Urban Health in Latin America: The SALURBAL Experience
Source: PubMed Central journal article supplement (PMC11652544; doi:10.1007/s11524-024-00877-5), 2024-06-27
Supplement: 11524_2024_877_MOESM1_ESM.pdf [file 11524_2024_877_MOESM1_ESM.pdf]

# Supplement

Research translation to promote urban health in Latin America: the SALURBAL experience

## Supplementary Table 1

| Type    | Year | Title                                                                                                                      | Notes                                                                                                                                                                                                                                                  |
|---------|------|----------------------------------------------------------------------------------------------------------------------------|--------------------------------------------------------------------------------------------------------------------------------------------------------------------------------------------------------------------------------------------------------|
| Policy  | 2017 | Sustainable transport and urban health                                                                                     | Developed with input from a policy dialogue event in Bogotá, Colombia, in May 2017                                                                                                                                                                     |
| Policy  | 2018 | Food and urban health                                                                                                      | Developed with input from the Economic Commission for Latin America and the Caribbean (ECLAC) and the United Nations University (UNU)                                                                                                                  |
| Data    | 2018 | Data in SALURBAL                                                                                                           | General overview of SALURBAL's compiled data                                                                                                                                                                                                           |
| Policy  | 2019 | Planning health evaluations of housing and neighborhood interventions                                                      | Features three of SALURBAL's policy evaluation projects, including notes on collaboration with policy partners.                                                                                                                                        |
| Policy  | 2019 | Health in all urban policies                                                                                               | Developed in partnership with the Pan American Health Organization (PAHO) and disseminated at the Third Regional Meeting of Mayors for Healthy Municipalities, Cities, and Communities in the Region of the Americas                                   |
| Data    | 2019 | Mortality and life expectancy in Latin American cities                                                                     | Includes recommendations for local authorities regarding the completeness and quality of birth and death registrations; disseminated during a SALURBAL webinar on inequality in mortality outcomes in Latin American cities.                           |
| Policy  | 2020 | Knowledge to policy translation for urban health                                                                           | Developed with input from SALURBAL's Knowledge-to-Policy Forum                                                                                                                                                                                         |
| Policy  | 2020 | Public transportation and active transportation during the pandemic                                                        | Informed by literature review requested by Mexico City government <sup>26</sup>                                                                                                                                                                        |
| Data    | 2020 | Infant mortality in Latin American cities                                                                                  | Features research findings regarding the influence of housing, education, transportation, sanitation, and women's empowerment on infant survival; disseminated during a SALURBAL webinar on inequality in mortality outcomes in Latin American cities. |
| Results | 2020 | Urban transformations and health: Results from the TransMiCable evaluation                                                 | Developed in partnership with the Ministry of Health of Colombia and the Planning department of Bogotá                                                                                                                                                 |
| Policy  | 2021 | Green space and water security: Examples of climate change adaptation from the public and private sectors in Latin America | Developed in partnership with CDP                                                                                                                                                                                                                      |

|         |      |                                                                                                            |                                                                                                                                                                                                                                               |
|---------|------|------------------------------------------------------------------------------------------------------------|-----------------------------------------------------------------------------------------------------------------------------------------------------------------------------------------------------------------------------------------------|
| Data    | 2021 | COVID-19 and urban health in Latin America and the Caribbean                                               | Developed with data from SALURBAL's COVID-19 data dashboard that combines and visualizes open data from 11 country governments                                                                                                                |
| Policy  | 2022 | Climate change and urban health                                                                            | Includes recommendations for both urban policymakers and public health researchers                                                                                                                                                            |
| Results | 2022 | Urban Transformations and health: Results from the evaluation of TransMiCable during the COVID-19 pandemic | Developed in partnership with the Ministry of Health of Colombia and the Planning department of Bogotá                                                                                                                                        |
| Data    | 2023 | Making the Invisible, Visible: Race, Racism and Health Data in Latin American Cities                       | Developed in partnership with the Ubuntu Center on Racism, Global Movements and Population Health Equity. Outlines barriers to and recommendations for advancing research and action on racial and ethnic health inequities in Latin America. |

5 *Supplementary Table 1: SALURBAL's policy and data briefs with notes on their content, development, and dissemination.*

## 6 **Supplementary Table 2**

| Date             | Theme/topic                                                                  | Language(s) |
|------------------|------------------------------------------------------------------------------|-------------|
| 1 July 2020      | Inequality in mortality outcomes in Latin American cities                    | English     |
| 4 August 2020    | <i>Desigualdad en resultados de mortalidad en ciudades de América Latina</i> | Spanish     |
| 9 September 2020 | Air pollution and health in Latin American cities                            | English     |
| 15 October 2020  | <i>Contaminación del aire y salud en ciudades latinoamericanas</i>           | Spanish     |
| 17 November 2020 | Road safety in Latin American cities                                         | English     |
| 1 December 2020  | <i>Seguridad vial en ciudades Latinoamericanas</i>                           | Spanish     |

7 *Supplementary Table 2: SALURBAL's research dissemination webinars are listed, noting the date each occurred or was*  
8 *released, the title or topic of the event, and the language.*

## 9 **Supplementary Table 3**

| Date and location                            | Theme/topic                                                                                                                                          | Host institution and local partners/<br>panelists                                                                                                                               | Language(s) |
|----------------------------------------------|------------------------------------------------------------------------------------------------------------------------------------------------------|---------------------------------------------------------------------------------------------------------------------------------------------------------------------------------|-------------|
| 19 May 2017<br><i>Bogotá,<br/>Colombia</i>   | Expert panels on sustainable transportation and health /<br><i>Panel de Expertos en Transporte Sostenible y Salud</i>                                | Universidad de los Andes<br>Bogotá legislative chamber<br>Organización Despacio<br>Bogotá health secretariat<br>World Resources Institute<br>Federal University of Minas Gerais | Spanish     |
| 15 November 2017<br><i>Lima, Peru</i>        | Local interventions and policies to improve urban health in Lima /<br><i>Intervenciones y políticas locales para mejorar la salud urbana en Lima</i> | Universidad Peruana Cayetano Heredia<br>Lima Como Vamos<br>German international development agency (GIZ)<br>Juegos Panamericanos                                                | Spanish     |
| 18 May 2018<br><i>Antigua,<br/>Guatemala</i> | Research and policy symposium on Urban Health Policies and                                                                                           | Institute of Nutrition of Central America and Panama (INCAP)                                                                                                                    | Spanish     |

|                                                              |                                                                                                                                                                                                                               |                                                                                                                                                             |                     |
|--------------------------------------------------------------|-------------------------------------------------------------------------------------------------------------------------------------------------------------------------------------------------------------------------------|-------------------------------------------------------------------------------------------------------------------------------------------------------------|---------------------|
|                                                              | Interventions in Central America                                                                                                                                                                                              | Central American Integration System (SICA)<br>SALURBAL team<br>Local community, policy, and academic representatives                                        |                     |
| 24 May 2019<br><i>Belo Horizonte, Brazil</i>                 | Health, Housing, and Neighborhood Interventions in Brazil / <i>Saúde, habitação e políticas urbanas no Brasil</i>                                                                                                             | Federal University of Minas Gerais, Brazil<br>Local communities, policy audiences, technical experts, and researchers                                       | Portuguese, English |
| 24 October 2019<br><i>Lima, Peru</i>                         | “Chelas Urbanas” series organized by the Lima Cómo Vamos Observatory                                                                                                                                                          | Lima Cómo Vamos<br>Universidad Peruana Cayetano Heredia (UPCH)<br>SALURBAL Executive Committee members and local road safety experts and urban stakeholders | Spanish             |
| 20 April 2020<br><i>Virtual (Costa Rica)</i>                 | Webinar on Social distancing and inequality in Latin America                                                                                                                                                                  | University of Costa Rica<br>SALURBAL researchers and Executive Committee members                                                                            | Spanish             |
| 11 March 2021<br><i>Virtual (Guatemala)</i>                  | <i>Obesidad y diabetes: Entendiendo el rol de nuestras ciudades</i> (Obesity and diabetes: Understanding the role of our cities)                                                                                              | INCAP, Guatemala<br>Local policymakers and urban planning officials                                                                                         | Spanish             |
| 5-6 May 2021<br><i>Virtual (Brazil)</i>                      | <i>Equidade e Saúde Urbana no Brasil / Saúde e sustentabilidade: Desafios de política pública na cidade de Salvador</i> (Equity and urban health in Brazil / Health and sustainability: Public policy challenges in Salvador) | Center for Data and Knowledge Integration for Health (CIDACS), Brazil<br>Local officials<br>Local community members<br>SALURBAL researchers                 | Portuguese          |
| 27 May 2021<br><i>Virtual (Chile)</i>                        | <i>Ciudad y Vivienda: Determinantes clave para la salud poblacional</i> (Cities and housing: Key determinants of population health)                                                                                           | Pontifical Catholic University of Chile (PUC)<br>University of Chile (UC)<br>Chilean Ministry of Housing<br>Local authorities                               | Spanish             |
| 2 September 2021<br><i>Virtual (Brazil, Chile, Colombia)</i> | <i>Transformaciones urbanas, participación comunitaria y salud: aprendizajes de Brazil, Chile, y Colombia</i> (Urban transformations, community participation, and health: Lessons from                                       | UniAndes, Colombia<br>PUC<br>Federal University of Minas Gerais<br>Local policymakers and community members from each locality                              | Spanish, Portuguese |

|                                                 |                                                                                                                                                                                        |                                                                                                                                                                                              |                              |
|-------------------------------------------------|----------------------------------------------------------------------------------------------------------------------------------------------------------------------------------------|----------------------------------------------------------------------------------------------------------------------------------------------------------------------------------------------|------------------------------|
|                                                 | Brazil, Chile, and Colombia)                                                                                                                                                           |                                                                                                                                                                                              |                              |
| 28 September 2021<br><i>Virtual (Brazil)</i>    | <i>Mobilidade, Poluição Do Ar E Mudanças Climáticas: Desafios Para As Cidades Da América Latina</i> (Mobility, Air Pollution and Climate Change: Challenges for Latin American Cities) | University of São Paulo<br>Federal University of Minas Gerais<br>CDP (the Carbon Disclosure Project)<br>Municipal Secretary of Transport and Mobility                                        | Portuguese                   |
| 28 October 2021<br><i>Virtual (Brazil)</i>      | <i>Como os alimentos chegam e são distribuídos nas cidades?</i> (How does food move around our cities?)                                                                                | The Oswaldo Cruz Foundation (FIOCRUZ)<br>Federal University of Minas Gerais<br>Local policymakers and community representatives                                                              | Portuguese                   |
| 14 September 2022<br><i>Virtual (Guatemala)</i> | SALURBAL Symposium: Promoting child health in urban environments                                                                                                                       | INCAP, SICA<br>Drexel University                                                                                                                                                             | Spanish                      |
| 31 January 2023<br><i>Virtual (Brazil, USA)</i> | Making the invisible, visible: Race, racism, and health data                                                                                                                           | The Ubuntu Center on Racism, Global Movements and Population Health Equity<br>Drexel University Urban Health Collaborative<br>CIDACS<br>Iyaleta<br>Pan-Diaspora Project<br>McGill University | Portuguese, Spanish, English |
| March 2023<br><i>Mexico City, Mexico</i>        | SALURBAL Project results and their relevance for the Mexican context                                                                                                                   | National Institute of Public Health, Mexico (INSP)<br>Pan American Health Organization<br>Metropolitan Area Air Quality Program<br>Secretary for Health Promotion                            | Spanish                      |

10 *Supplementary Table 3: SALURBAL's locally focused, in-person and virtual dissemination events, including date, theme or topic,*  
11 *a list of host and partner institutions, and language are noted.*

## 12 **Supplementary Table 4**

| <b>Indicator</b>                    | <b>Description</b>                                                                                  | <b>2017-2023</b> |
|-------------------------------------|-----------------------------------------------------------------------------------------------------|------------------|
| Unique website page visits          | Total number of unique page views, excluding repeat visits                                          | 83,391           |
| Website visitor countries           | Number of countries from which the project's website has been accessed                              | 170              |
| Newsletter subscribers              | The number of individuals signed-up to receive the project's quarterly digital newsletter           | 479              |
| Twitter followers                   | The number of total followers the project has on Twitter                                            | 1,736            |
| Average monthly Twitter impressions | The average number of impressions Tweets from the project received per month throughout the project | 16,000           |

|                              |                                                                                                                                                                        |       |
|------------------------------|------------------------------------------------------------------------------------------------------------------------------------------------------------------------|-------|
| Virtual dissemination events | Number of virtual events hosted by SALURBAL (LAC-Urban Health webinar series, Diálogos SALURBAL, and other events) that aimed to disseminate findings to policy actors | 13    |
| YouTube views                | The number of views all project videos and recordings (including virtual event recordings) have received                                                               | 2,748 |
| Data and policy briefs       | The number of data and policy briefs produced by SALURBAL                                                                                                              | 12    |
| Blog posts                   | The number of posts published on SALURBlog                                                                                                                             | 60    |
| Media releases               | Total number of media releases created and shared with journalists                                                                                                     | 13    |

13 *Supplementary table 4: Select digital dissemination and communications metrics for SALURBAL's website, social media, print*  
14 *materials, virtual events, and media engagement.*

15
